# Supplementary material
Source: PubMed Central journal article supplement (PMC3415517)
Supplement: JB.00668-12_zjb999091837so1.pdf [file JB.00668-12_zjb999091837so1.pdf]

**TABLE S1** Oligonucleotides used in this study.

| Oligonucleotide | Sequence (5'→3') <sup>a</sup>                                              | Used for                                                                                                                                             |                                                             |
|-----------------|----------------------------------------------------------------------------|------------------------------------------------------------------------------------------------------------------------------------------------------|-------------------------------------------------------------|
| P01             | fwd, atacatatggaacgacgacgagggaccgc;                                        | construction of pET-ttPfmR                                                                                                                           |                                                             |
| P02             | rev, tatggatcctattaggaactccacgttccaaccccctc                                |                                                                                                                                                      |                                                             |
| P03; P04        | fwd, aagcttgagtcttcgccctcccctc; rev, atattctagacggtcccctcgtcgtcgttac       | construction of plasmid for <i>pfmR</i> gene disruptant                                                                                              |                                                             |
| P05; P06        | fwd, atatctgcaggggtggaacgtggaagtgcc; rev, gaattctctccgggtcggcttggcg        |                                                                                                                                                      |                                                             |
| P07             | gtttcacgaggcgtgaaggacctcaa: positions 14,329–14,303 on pTT27               | confirmation of replacement of the <i>pfmR</i> gene by the kanamycin-resistance marker ( <i>HTK</i> ) gene on the genome of the $\Delta pfmR$ strain |                                                             |
| P08             | taggccgagctcccctcagagggct: positions 12,617–12,591 on pTT27                |                                                                                                                                                      |                                                             |
| P09             | ggtagccgttgacggcgatattgtaca: positions 1–28 of the <i>HTK</i> gene         |                                                                                                                                                      |                                                             |
| P10             | ctttaccgaaaatcgcttgatgagtc: positions 98–72 of the <i>HTK</i> gene         |                                                                                                                                                      |                                                             |
| P11             | cggatatatagggatgtgtcaaacgc: positions 998–1025 of the <i>HTK</i> gene      |                                                                                                                                                      |                                                             |
| P12             | tgcagcgaaccaacatgattaacaattat: positions 1080–1051 of the <i>HTK</i> gene  |                                                                                                                                                      |                                                             |
| P13             | tggggctttccaaggcccccctcta: positions 101–125 of <i>pfmR</i> gene           |                                                                                                                                                      |                                                             |
| P14             | atcgggccgaaccagcggatcat: positions 498–475 of <i>pfmR</i> gene             |                                                                                                                                                      |                                                             |
| P15             | fwd, gatccggcccttgacggggccccgggaggggagtagggtagggcttaccgaccggttgctcgtcggag; |                                                                                                                                                      | construction of upstream region of the <i>TTHA0750</i> gene |
| P16             | rev, aattctccagacgaccaaccggctcggaagcccaccctactcccctccccggggccccgtcaagggccg |                                                                                                                                                      |                                                             |
| P17             | fwd, gatccgtcgttgaccccgccccgccttccggctaagctactaccgaccggttcggaaggaggag;     | construction of upstream region of the <i>TTHA0987</i> gene                                                                                          |                                                             |
| P18             | rev, aattctcctctaccgaaccggtcggtagtagcttagccggaaggcggggcggggtcaagcgacg      |                                                                                                                                                      |                                                             |
| P19             | fwd, gatcctggtcttgacgagaaagagaaaaacgggtaaggtgaacctaccgaccggtcgggtgggctatgg | construction of upstream region of the <i>TTHB023</i> gene                                                                                           |                                                             |
| P20             | rev, aattccatagcccaccgaccggtcggttaggtcacctaccggctttctcttctcgtcaagaccag     |                                                                                                                                                      |                                                             |
| P21             | fwd, tgcagcctgcaggtcgact                                                   | preparation of template DNA for the transcription assay                                                                                              |                                                             |
| P22             | rev, gatcgggtcgggcctcttcg                                                  |                                                                                                                                                      |                                                             |
| P23             | <sub>p</sub> atcaccaccgatgg                                                | cDNA synthesis of <i>TTHA0750</i> gene                                                                                                               |                                                             |
| P24             | <sub>p</sub> cgtagacgtcctcca                                               | cDNA synthesis of <i>TTHA0987</i> gene                                                                                                               |                                                             |
| P25             | <sub>p</sub> ctccttgcctccgaa                                               | cDNA synthesis of <i>TTHB023</i> gene                                                                                                                |                                                             |

Continued on next page.

**TABLE S1** Continued.

|          |                                                      |                                                          |
|----------|------------------------------------------------------|----------------------------------------------------------|
| P26; P27 | fwd, ctggagctcttcgccaag; rev, gccctgtgatgagcac       | 1 <sup>st</sup> PCR for 5'-RACE for <i>TTHA0750</i> gene |
| P28; P29 | fwd, gacgacctcctcgcccac; rev, ttgccgatgggggtccta     | 1 <sup>st</sup> PCR for 5'-RACE for <i>TTHA0987</i> gene |
| P30; P31 | fwd, ctacgaggccaccagcgt; rev, tcggtgaagagcttggcg     | 1 <sup>st</sup> PCR for 5'-RACE for <i>TTHB023</i> gene  |
| P32; P33 | fwd, gtggcctgcgacatagag; rev, cttgtccttgagccgcat     | 2 <sup>nd</sup> PCR for 5'-RACE for <i>TTHA0750</i> gene |
| P34; P35 | fwd, ctccggcgtcccaaaga; rev, cttccacgatccaggctt      | 2 <sup>nd</sup> PCR for 5'-RACE for <i>TTHA0987</i> gene |
| P36; P37 | fwd, ccctgggctttccaagg; rev, gtcctcgtcgtcgttac       | 2 <sup>nd</sup> PCR for 5'-RACE for <i>TTHB023</i> gene  |
| P38; P39 | fwd, gacctgatcctgagggggtt; rev, aggaactcctcccgcacctc | RT-PCR for <i>TTHB023-018</i> operon                     |

<sup>a</sup>fwd, forward; rev, reverse. p, phosphorylated at the 5' terminal. HTK, kanamycin-resistance marker.

**TABLE S2** Genes exhibiting altered expression in the  $\Delta pfmR$  strain, in comparison with the wild type. The expression levels in the  $\Delta pfmR$  strain relative to those in the wild type, and the  $q$  values of the observed differences between the wild type and  $\Delta pfmR$  strains, are shown. Only genes for which the  $q$  values are less than or equal to 0.05 are shown. *TTHA*, *TTHB*, and *TTHV* denote the genes on chromosomal DNA, pTT27, and pVV8, respectively.

| Gene Name                 | Annotation for product                                         | Expression ( $q$ ) |
|---------------------------|----------------------------------------------------------------|--------------------|
| <i>TTHA0102</i>           | Hypothetical protein                                           | 1.477 (0.05)       |
| <i>TTHA0131</i>           | Hypothetical protein                                           | 0.820 (0.05)       |
| <i>TTHA0207</i>           | Nicotinamide nucleotide transhydrogenase, alpha subunit 2      | 1.456 (0.05)       |
| <i>TTHA0267</i>           | Oxygen-insensitive NADPH nitroreductase                        | 1.268 (0.05)       |
| <i>TTHA0346</i>           | Peptidyl-prolyl cis-trans isomerase                            | 0.622 (0.05)       |
| <i>TTHA0684</i>           | Probable TolQ-type transport protein                           | 0.627 (0.05)       |
| <i>TTHA0750</i>           | 3-oxoacyl-[acyl carrier protein] reductase                     | 3.568 (0.05)       |
| <i>TTHA0751</i>           | Hypothetical protein                                           | 1.988 (0.05)       |
| <i>TTHA0752</i>           | Beta-lactamase family protein                                  | 1.941 (0.05)       |
| <i>TTHA0829</i>           | Putative acetoin utilization protein, acetoin dehydrogenase    | 1.585 (0.05)       |
| <i>TTHA0987</i>           | Beta-ketoadipyl CoA thiolase                                   | 3.851 (0.05)       |
| <i>TTHA1154</i>           | Hypothetical protein                                           | 0.548 (0.05)       |
| <i>TTHA1256</i>           | Hypothetical protein                                           | 0.718 (0.05)       |
| <i>TTHA1317</i>           | Immunogenic protein related protein                            | 1.600 (0.05)       |
| <i>TTHA1410</i>           | Sulfite dehydrogenase cytochrome subunit SoxD                  | 0.416 (0.05)       |
| <i>TTHA1908</i>           | Lysine biosynthesis enzyme LysW                                | 1.289 (0.05)       |
| <i>TTHB013</i>            | Hypothetical protein                                           | 2.633 (0.05)       |
| <i>TTHB023</i>            | Transcriptional regulator, TetR family (PfmR)                  | 0.003 (0.05)       |
| <i>TTHB125</i>            | Chromosome partitioning ATPase, ParA family                    | 1.250 (0.05)       |
| <i>TTHV006 (TTHY7063)</i> | Filamentation induced by cAMP protein Fic                      | 0.015 (0.05)       |
| <i>TTHV007 (TTHY7057)</i> | Putative adenine-specific DNA methylase                        | 0.251 (0.05)       |
| <i>TTHV009 (TTHY7058)</i> | HicB family protein                                            | 0.009 (0.05)       |
| <i>TTHV010 (TTHY7032)</i> | Helix-turn-helix domain protein                                | 0.123 (0.05)       |
| <i>TTHV011 (TTHY7078)</i> | Hypothetical protein                                           | 0.025 (0.05)       |
| <i>TTHV065 (TTHY7040)</i> | Transposase, IS605 OrfB family                                 | 0.012 (0.05)       |
| <i>TTHV066 (TTHY7084)</i> | PilT protein domain protein                                    | 0.033 (0.05)       |
| <i>TTHV067 (TTHY7084)</i> | Toxin-antitoxin system, antitoxin component, PHD family        | 0.033 (0.05)       |
| <i>TTHV034 (TTHY7018)</i> | Glycerol-3-phosphate ABC transporter substrate-binding protein | 0.154 (0.05)       |
| <i>TTHV046 (TTHY7064)</i> | Hypothetical protein                                           | 0.05 (0.05)        |
| <i>TTHV074 (TTHY7080)</i> | Hypothetical protein                                           | 0.217 (0.05)       |
| <i>TTHV085 (TTHY7010)</i> | Xylose isomerase                                               | 0.277 (0.05)       |

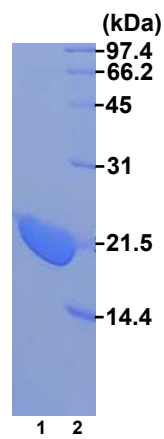

**FIG. S1** Sodium dodecyl sulfate-polyacrylamide gel electrophoresis analysis of PfmR. The purified protein (4  $\mu$ g) was analyzed on a 12% polyacrylamide gel, which was stained with Coomassie Brilliant Blue R-250. Lane 2, molecular mass markers.

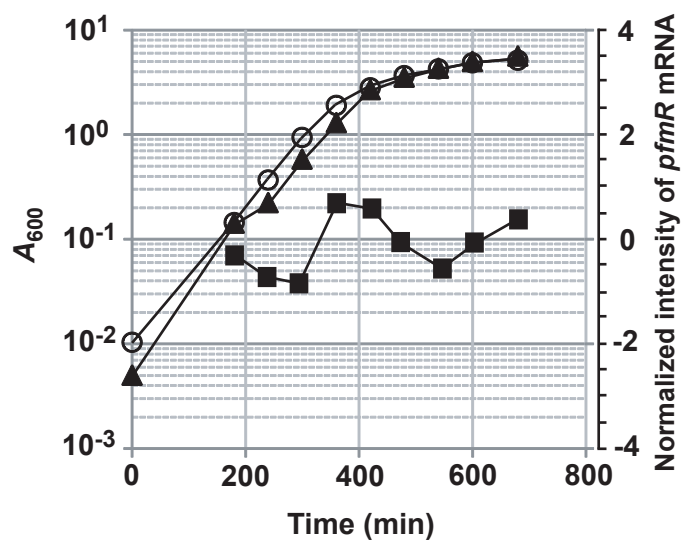

**FIG. S2** Growth of *T. thermophilus* wild-type (open circles) and  $\Delta pfmR$  (closed triangles) strains. The strains were cultured in rich medium, and the  $A_{600}$  values at the indicated times are shown. The expression of *pfmR* mRNA (Normalized intensity of *pfmR* mRNA) in the wild-type strain was investigated at the indicated times using GeneChip technology (closed squares). Each normalized intensity at the indicated times, calculated as described in the Materials and Methods in the main text, were further normalized as to the mean value of the *pfmR* intensities.

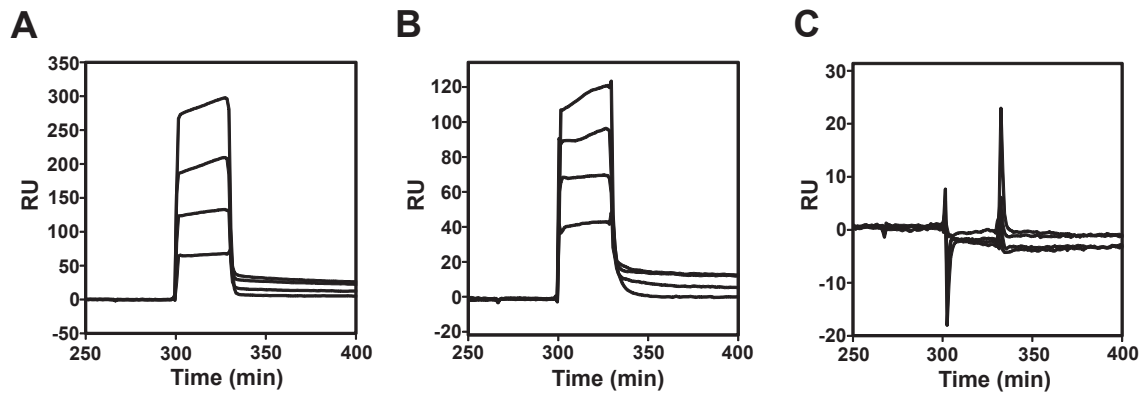

**FIG. S3** BIAcore biosensor analyses of the interactions between the *T. thermophilus* TetR family transcriptional regulators and DNA. A double-stranded DNA fragment corresponding to the upstream region of the *TTHB023* gene (see text), which contains the predicted PfmR-binding site (A), that of the *TTHA0963* gene (ref. 33), which contains the predicted PaaR-binding site (B), or that of the *TTHA0890* gene (ref. 1), which contains the predicted FadR-binding site, was immobilized on the sensor chip, and then the FadR (A and B) or PaaR (C) protein was injected over the DNA surface, at concentrations of 0.4, 0.3, 0.2, and 0.1  $\mu$ M dimer, as described in the text.

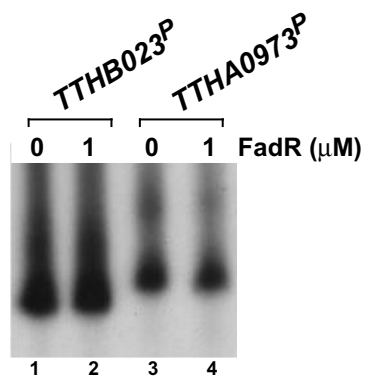

**FIG. S4** Effects of *T. thermophilus* FadR on transcription *in vitro*. Run-off transcription assays were performed with templates containing the upstream sequences of the genes regulated by PfmR (*TTHB023<sup>P</sup>*) (lanes 1 and 2) and PaaR (*TTHA0973<sup>P</sup>*) (ref. 33) (lanes 3 and 4), in the absence (lanes 1 and 3) or presence (lanes 2 and 4) of 1 μM FadR. After the reaction, the samples were fractionated on the polyacrylamide gel, followed by autoradiography.

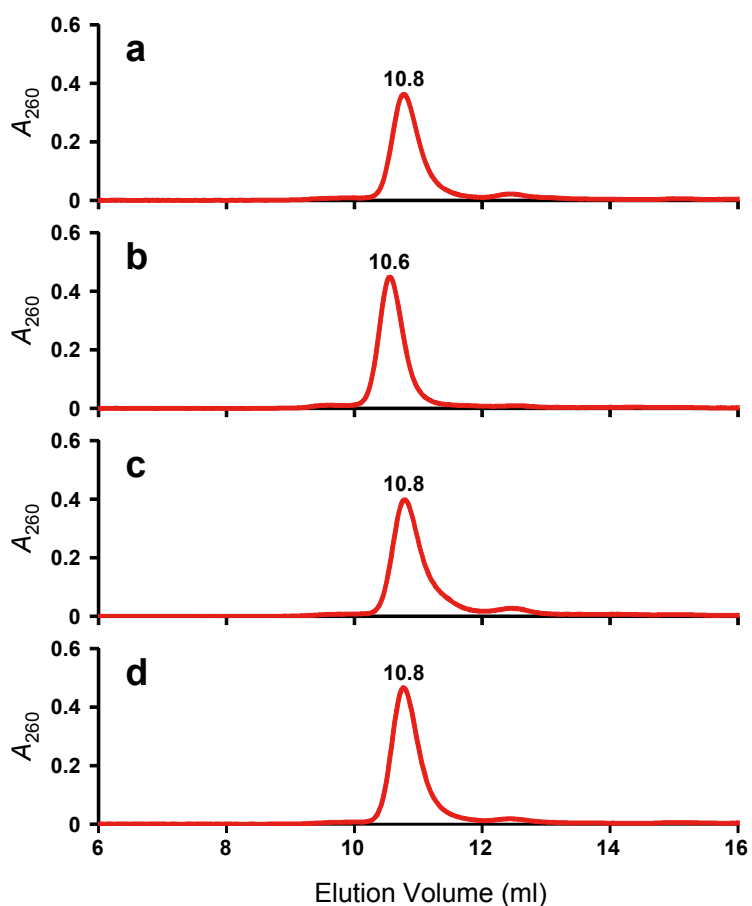

**FIG. S5** Gel-filtration analysis of the DNA fragment. Elution profiles of samples (26  $\mu$ l) comprising 25  $\mu$ M of the 28-bp DNA fragment derived from the upstream region of the *TTHB023* gene (see text) (a), 25  $\mu$ M of the 31-bp DNA fragment derived from the upstream region of the *TTHA0890* gene (ref. 1) (b), 25  $\mu$ M of the 28-bp DNA fragment derived from the upstream region of the *TTHB023* gene containing the A6C/T6'G mutations (see text) (c), and 25  $\mu$ M of the 28-bp DNA fragment derived from the upstream region of the *TTHB023* gene containing the C8A/G8'T mutations (see text) (d). The elution buffer was of 10 mM sodium phosphate (pH 7.0), containing 0.3 M NaCl. Relative absorbance at 260 nm is indicated. The elution volume at the top of the peak is indicated.
